# Supplementary material for: Intelligent context-aware energy management using the incremental simultaneous method in future wireless sensor networks and computing systems
Source: Springer Nature journal article supplement (doi:10.1186/1687-1499-2013-10), 2013-01-22
Supplement: 13638_2012_658_MOESM2_ESM.pdf [file 13638_2012_658_MOESM2_ESM.pdf]

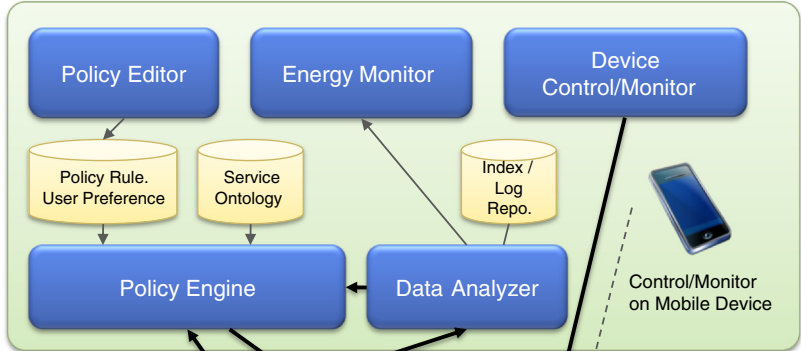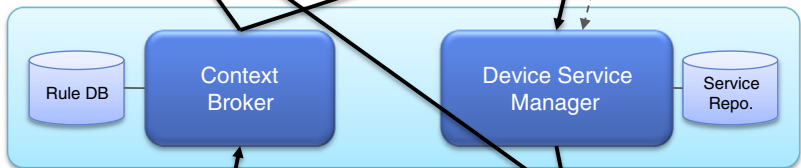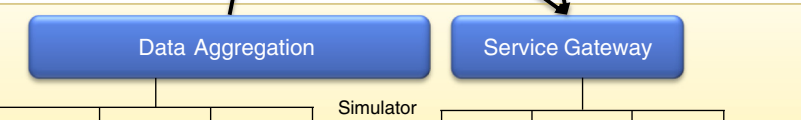

- Icons representing the simulated environment components:
- PIR. Temperate
  - CO2
  - Electricity
  - Gas
  - Electricity control
  - Heating
  - Cooling
  - FAN
  - Light
