# Supplementary material for: Intelligent context-aware energy management using the incremental simultaneous method in future wireless sensor networks and computing systems
Source: Springer Nature journal article supplement (doi:10.1186/1687-1499-2013-10), 2013-01-22

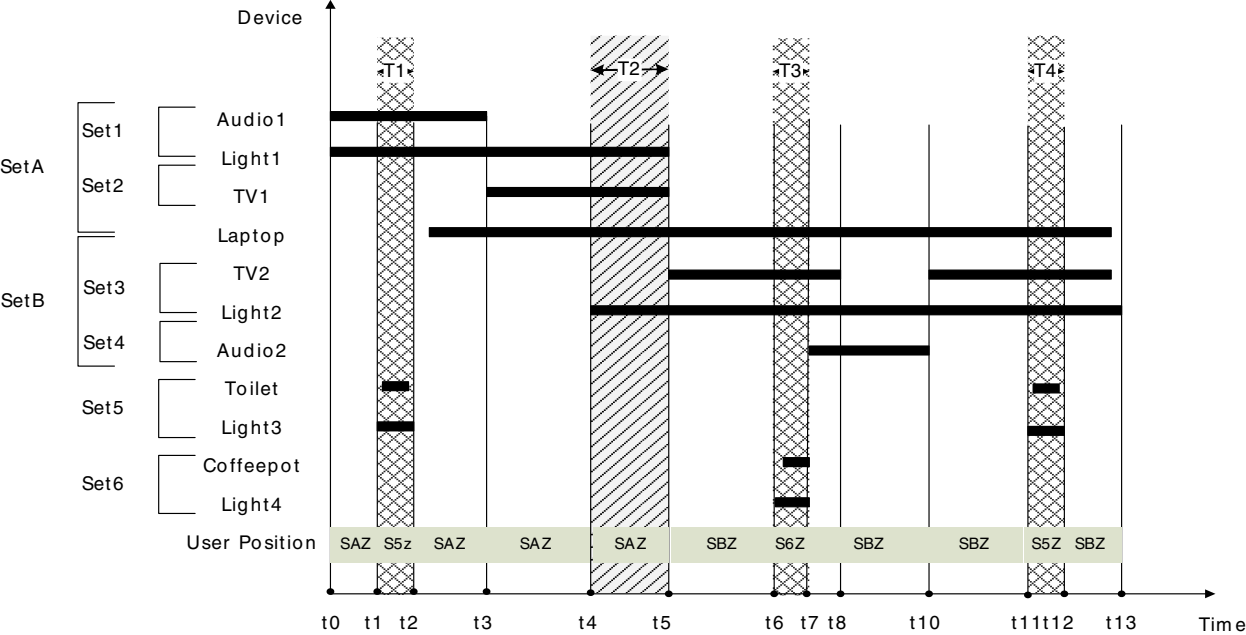

Supplement: 13638_2012_658_MOESM4_ESM.pdf [file 13638_2012_658_MOESM4_ESM.pdf]
